# Supplementary material
Source: PubMed Central journal article supplement (PMC5338495)
Supplement: pnas.1614437114.sapp.pdf [file pnas.1614437114.sapp.pdf]

Supporting Information for: *Trade-offs between enzyme fitness and solubility illuminated by deep mutational scanning*

*Running Title:* Deep Mutational Scanning Enzyme Solubility

**Authors:** Justin R. Klesmith<sup>1,a</sup>, John-Paul Bacik<sup>2,b</sup>, Emily E. Wrenbeck<sup>3</sup>, Ryszard Michalczyk<sup>2</sup>, Timothy A. Whitehead<sup>3,4,\*</sup>

<sup>1</sup> Department of Biochemistry and Molecular Biology, Michigan State University, East Lansing, Michigan, 48824;

<sup>2</sup> Bioscience Division, Los Alamos National Laboratory, Los Alamos, New Mexico, 87545;

<sup>3</sup> Department of Chemical Engineering and Materials Science, Michigan State University, East Lansing, Michigan, 48824;

<sup>4</sup> Department of Biosystems and Agricultural Engineering, Michigan State University, East Lansing, Michigan, 48824;

<sup>a</sup> Current address: Department of Chemical Engineering & Materials Science, University of Minnesota, Minneapolis, Minnesota, 55455

<sup>b</sup> Current address: Department of Chemistry, Princeton University, Princeton, New Jersey, 08544

\* Corresponding author: Timothy A. Whitehead, 428 S. Shaw Ln. Room 2100, Michigan State University, East Lansing, Michigan, USA, 48824; (517) 432-2097; taw@egr.msu.edu

## SUPPORTING INFORMATION

### SI Text

#### *Reagents*

All DNA primers were ordered from IDT and genetic constructs were sequence verified by Genewiz. All chemicals and plates were purchased from Sigma-Aldrich.

#### *Plasmid construction*

The pSALECT and pETConNK plasmid backbones were used as previously described (1). In short, a  $\Delta$ S4-A25 truncation using the Ambler consensus numbering system (2) of TEM-1 BLA S70A and D179G (**Notes S1 and S2**) were cloned in-between the *NdeI* and *XhoI* sites of the two backbones to create the pSALECT-TEM1.1/csTEM1 and pETConNK-TEM1.1 plasmids. The codon optimized DNA sequence for LGK (3) was cloned in-between the *NdeI* and *XhoI* sites of the two backbones to create the pSALECT-LGK/csTEM1 and pETConNK-LGK plasmids. Expression constructs for TEM-1.1 (pSAL\_TEM1.1) were constructed from pSALECT-TEM1.1/csTEM1 by removing csTEM1 by PCR. Plasmids and full maps are freely available on AddGene ([www.addgene.org](http://www.addgene.org)).

#### *Library construction*

Mutagenic primers encoding degenerate bases (NNN) were used for residues G8 to T435 for LGK and H26 to W290 for TEM-1.1. Plasmids were transformed into *E. coli* XL1-Blue and plasmids were extracted using a Qiagen miniprep kit the following day.

For generation of YSD libraries, chemically competent EBY100 yeast was transformed with 5  $\mu$ g of pETConNK based library plasmid DNA and grown in 50 mL SDCAAs (Synthetic complete media supplemented with amino acids, 2% (w/v) dextrose, and 10,000 u/mL penicillin/streptomycin (Invitrogen, Carlsbad, CA, USA)) (4) for 24 hours at 30°C. The cells were passaged into fresh 50 mL SDCAAs media and grown for another 24 hours. Yeast were stored in yeast storage buffer (20 mM HEPES 150 mM NaCl pH 7.5, 20% (w/v) glycerol) (5) at -80°C in 1 mL aliquots at an OD<sub>600</sub>=1.0 (1 yeast OD<sub>600</sub> = 2x10<sup>7</sup> cells/mL).

10 ng of pSALECT based library plasmid DNA was transformed into electrocompetent *E. coli* MC4100 (Coli Genetic Stock Center, New Haven, CT) and plated on a Nunc Bioassay Plate (245 mm X 245 mm X 25 mm) at 30°C overnight. Transformation controls were performed to limit double plasmid transformation (6). Cells were scraped and used to inoculate a 100 mL LB culture with 34  $\mu$ g/mL chloramphenicol at an initial OD<sub>600</sub> of 0.05 at 30°C and 250 rpm. When the cultures reached mid-log (OD<sub>600</sub> 0.40 to 0.60) DMSO was added at a final concentration of 7% (v/v), and 1 mL aliquots were flash frozen in liquid nitrogen.

### *Screening procedures*

Yeast display library cell stocks were thawed at room temperature and were used to inoculate a 1 mL SDCAAs at 30°C at an initial OD<sub>600</sub> of 1.0 for 6 to 8 hours. These cells were used to start a 1.1 mL SGCAAs (Synthetic complete media supplemented with amino acids, 2% (w/v) galactose, and 10,000 u/mL penicillin/streptomycin (Invitrogen, Carlsbad, CA, USA)) at an initial OD<sub>600</sub> of 1 at 30°C for 18 hours. The next day cells were spun down at top speed for 30 sec and the media pipette removed. Cold PBSF (137 mM NaCl, 2.7 mM KCl, 8 mM Na<sub>2</sub>HPO<sub>4</sub>,

and 2 mM  $\text{KH}_2\text{PO}_4$  with 1 g/L BSA) was added to the pellets to an  $\text{OD}_{600}$  of 2.0. The cells were washed with chilled PBSF. The cells were then subsequently labelled and sorted. Following sorting the cells were grown in 10 mL of SDCAAs at 30°C for 24 hours and were stored at -80°C in yeast storage buffer at a concentration of  $4 \times 10^7$  cells per mL. DNA was extracted from the yeast and prepared for sequencing using previously published protocols (6).

TAT export library cell stocks were thawed on ice for 45 minutes prior to washing with fresh LB media. The washed cells were used to start a 5 mL culture containing LB with 34  $\mu\text{g}/\text{mL}$  chloramphenicol inoculated at an initial  $\text{OD}_{600}$  of 0.05. The cells were grown aerobically at 30°C and 250 rpm until a culture  $\text{OD}_{600}$  of 0.8. The unselected library was prepared by pelleting 1 mL culture at 17,000xg for 2 min and storing the pellet at -20°C. Libraries were plated on 100 (TEM-1.1) or 200  $\mu\text{g}/\text{mL}$  (LGK) carbinicillin plates.

The LGK libraries were plated at 0.1  $\text{OD}_{600}/\text{mL}$  on two 100 mm diameter petri plates, while the TEM-1 libraries were plated at 3.2  $\text{OD}_{600}/\text{mL}$  on Nunc Bioassay Plates (245 mm X 245 mm X 25 mm). The number of cells plated was sufficient to support a 200-fold coverage of the theoretical DNA library in viable cells. Plates were cultured at 30°C in a humidified incubator for 12 hours. The following day the plates were scraped with 1x PBS, pelleted, and a Qiagen miniprep kit was used to extract DNA from saved cell pellets.

#### *Deep sequencing and data analysis*

Libraries were prepared for deep sequencing using a previously developed two step PCR method (6) with PCR primers listed in **Table S12**. The pooled library was extracted and cleaned with a

Qiagen gel cleanup kit. Deep sequencing was performed using an Illumina MiSeq in 300 bp paired-end mode. Replicates were sequenced in 250 bp paired-end mode. Sequencing data was processed using Enrich (7) to quantify the amount and enrichment of each mutation. Deep sequencing statistics are listed in **Tables S2-3**. Python scripts to calculate solubility scores are publically available at Github [user: JKlesmith] ([www.github.com](http://www.github.com)). Processed deep sequencing datasets are deposited at figshare ([www.figshare.com](http://www.figshare.com)).

To determine lower-bound solubility scores for each screen/selection, we first determined the half-median of read counts of the pre-selection library for each selection. This number was normalized by the ratio of post- to pre-selection read counts. Next, a lower-bound enrichment ratio ( $\epsilon_{LB}$ ) based on 10 read counts in the post-selection population was calculated:

$$\epsilon_{LB} = \log_2 \left( \frac{10}{f_{LB}} \right) \quad (5)$$

Where  $f_{LB}$  represents the normalized half-median pre-selection reads. The lower-bound solubility score was then calculated according to equations (3) and (4) using  $\epsilon_{LB}$  as calculated above.

### *PSSM Analysis*

A blastp search (8) of the nonredundant database for LGK and TEM-1 was performed with an e-value cut-off of  $10^{-4}$  and filtered to the top 20,000 results. Synthetic or engineered constructs were excluded from the hits. Hits were also excluded if they covered less than 85% of the query sequence or if their sequence identity was less than 34% for LGK or 40% for TEM-1. Cd-hit (9) was used at 98% clustering threshold and default parameters. MUSCLE (10) was then used to produce a multiple sequence alignment of the top 700 clusters. DSSP (11) was then used to

identify residues that are a part of loops and a part of secondary structure elements. Insert sequences in loop regions were removed such that the alignment has no gaps in the wild-type sequence. An alignment of sequences without any frameshifts was then independently extracted from each structured and non-structured region. PSI-BLAST (12) was then used on each region with the wild-type sequence as the query sequence.

### *Protein expression and purification*

*E. coli* BL21\*(DE3) harboring plasmid pSAL\_TEM1.1 were grown to an OD<sub>600</sub> of 0.8 at 37°C supplemented with 20 µg/ml chloramphenicol. Protein expression was induced with 1 mM IPTG for 18 h at 18°C. Proteins were purified using Ni-NTA chromatography exactly according to Bienick et al. (13). Apparent melting temperatures were measured by a modified SYPRO Orange thermal shift assay (3).

Recombinant *E. coli* BL21- GOLD (DE3) cells (Agilent Technologies) harboring plasmid pET29b\_LGK-G359R were grown to an OD<sub>600</sub> of ~ 0.5 at 37 °C, with shaking, in 500-ml volumes of LB media supplemented with 35 µg/ml kanamycin. Expression of LGK was induced with 1 mM IPTG for 3 h at 30 °C, with shaking. Cells were pelleted by centrifugation and stored at -80 °C. Pellets were thawed in 20 ml of ice-cold lysis buffer (0.5 M NaCl, 20 mM Tris-HCl pH 7.5, 0.1 mM PMSF, 2 mM imidazole) and lysed using a sonicator (Ameco). The lysate was clarified by centrifugation and mixed with 2 ml of TALON metal affinity resin (Clontech) with gentle shaking for 30 min. at room temperature. The TALON beads were centrifuged and re-suspended in binding buffer (500 mM NaCl, 20 mM Tris pH 7.5, 0.5 mM TCEP) before being poured into a 20 ml gravity column. The column was washed with 20 ml of binding buffer supplemented with 5 mM imidazole (Sigma), followed by 20 ml of binding buffer supplemented

with 10 mM imidazole. The LGK protein was eluted from the column with 10 ml of binding buffer supplemented with 250 mM imidazole. The protein was further purified by gel filtration (HiPrep 26/60 Sephacryl S-200 HR) in 20 mM Tris pH 7.5, 50 mM NaCl, 0.5 mM TCEP prior to concentration using an Amicon Ultra-15 concentrator with a 10,000 Da cut-off (Millipore). Chromatographic steps were performed using an AKTA FPLC (GE Healthcare).

#### *LGK crystallization, data collection and structure determination*

LGK crystals were grown at room temperature using the hanging drop vapor-diffusion method by mixing equal volumes of reservoir buffer (22% polyethylene glycol (PEG) 3350, 0.2 M K<sub>2</sub>SO<sub>4</sub>, 100 mM Tris pH 6.8) and LGK (23 mg/ml) in crystallization buffer (50 mM NaCl, 2 mM ADP, 4 mM MgCl<sub>2</sub>, 0.5 mM TCEP, 20 mM Tris pH 7.5). Crystals were cryoprotected by dragging them through a drop containing cryoprotectant solution, reservoir buffer supplemented with 9% sucrose (w/v), 2% glucose (w/v), 8% glycerol (v/v), 8% ethylene glycol (v/v), prior to being flash-cooled in liquid nitrogen. Data was collected at the Stanford Synchrotron Radiation Lightsource beamline BL7-1, integrated using MOSLFM (14) and scaled and merged using SCALA (15).

Structure was determined using rigid body refinement using (PDB identifier: 5BSB) as the starting model followed by iterative model building and refinement performed using Coot and PHENIX (16, 17). The stereochemical quality of the final model was assessed using MolProbity (18). Refinement statistics are presented in **Table S13**. All structural figures were prepared using PyMOL (19).

**Note S1: The amino acid sequence for TEM-1.1.** Mutations S70A and D179G are underlined in red highlight.

HPETLVKVKDAEDQLGARVGYIELDLNSGKILESFRPEERFPMMATFKVLLCGAVLSRV  
DAGQEQLGRRIHYSQNDLVEYSPVTEKHLTDGMTVRELCSAAITMSDNTAANLLLTIG  
GPKELTAFLHNMGDHSVTRLDRWEPELNEAIPNDERCTTMPAAMATTLRKLTTGELLTL  
ASRQQLIDWMEADKVAGPLLRALPAGWFIADKSGAGERGSRGIIAALGPDGKPSRIVVI  
YTTGSQATMDERNRQIAEIGASLIKHW

**Note S2: The DNA sequence for TEM-1.1.**

CACCCAGAAACGCTGGTGAAAGTAAAAGATGCTGAAGATCAGTTGGGTGCACGAGT  
GGGTTACATCGAACTGGATCTCAACAGCGGTAAGATCCTTGAGAGTTTTCGCCCCGA  
AGAACGTTTTCCAATGATGGCCACTTTTAAAGTTCTGCTATGTGGCGCGGTATTATCC  
CGTGTTGACGCCGGGCAAGAGCAACTCGGTCGCCGCATACACTATTCTCAGAATGA  
CTTGTTGAGTACTCACCAGTCACAGAAAAGCATCTTACGGATGGCATGACAGTAA  
GAGAATTATGCAGTGCTGCCATAACCATGAGTGATAAACTGCGGCCAACTTACTTC  
TGACAACGATCGGAGGACCGAAGGAGCTAACCGCTTTTTTGCACAACATGGGGGAT  
CATGTAACCTCGCCTTGATCGTTGGGAACCGGAGCTGAATGAAGCCATACCAAACGA  
CGAGCGTGGCACCACGATGCCTGCAGCAATGGCAACAACGTTGCGCAAACCTATTAA  
CTGGCGAACTACTTACTCTAGCTTCCCGGCAACAATTAATAGACTGGATGGAGGCGG  
ATAAAGTTGCAGGACCACTTCTGCGCTCGGCCCTTCCGGCTGGCTGGTTTATTGCTG  
ATAAATCTGGAGCAGGTGAGCGTGGGTCTCGCGGTATCATTGCAGCACTGGGGCCA  
GATGGTAAGCCCTCCCGTATCGTAGTTATCTACACGACGGGGAGTCAGGCAACTATG  
GATGAACGAAATAGACAGATCGCTGAGATAGGTGCCTCACTGATTAAGCATTGG



**Fig. S1: Deep sequencing pipeline.** A target protein is first mutagenized such that a DNA library encodes all possible amino acids. Next, a high-throughput selection or screen is performed to enrich beneficial mutants and deplete deleterious mutations. Deep sequencing is used to count each mutation to allow the frequency of that mutation in the population to be calculated. Finally, the frequencies are normalized to a solubility score for each mutation.

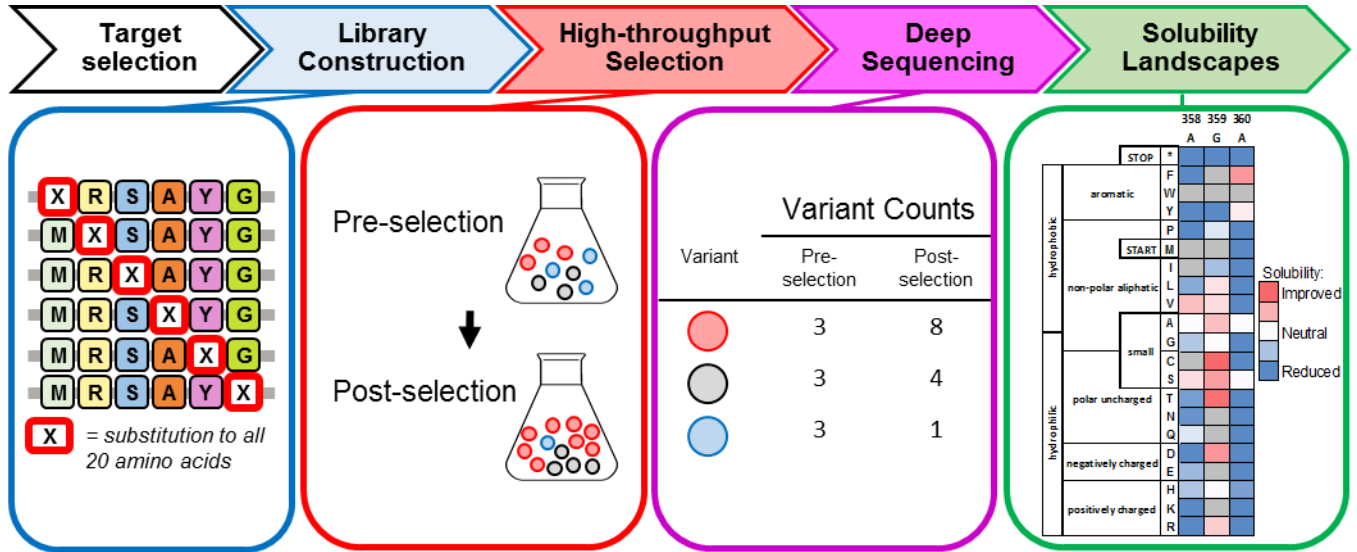

**Fig. S2: Heatmap of solubility score of TEM-1.1 variants screened by yeast display.**

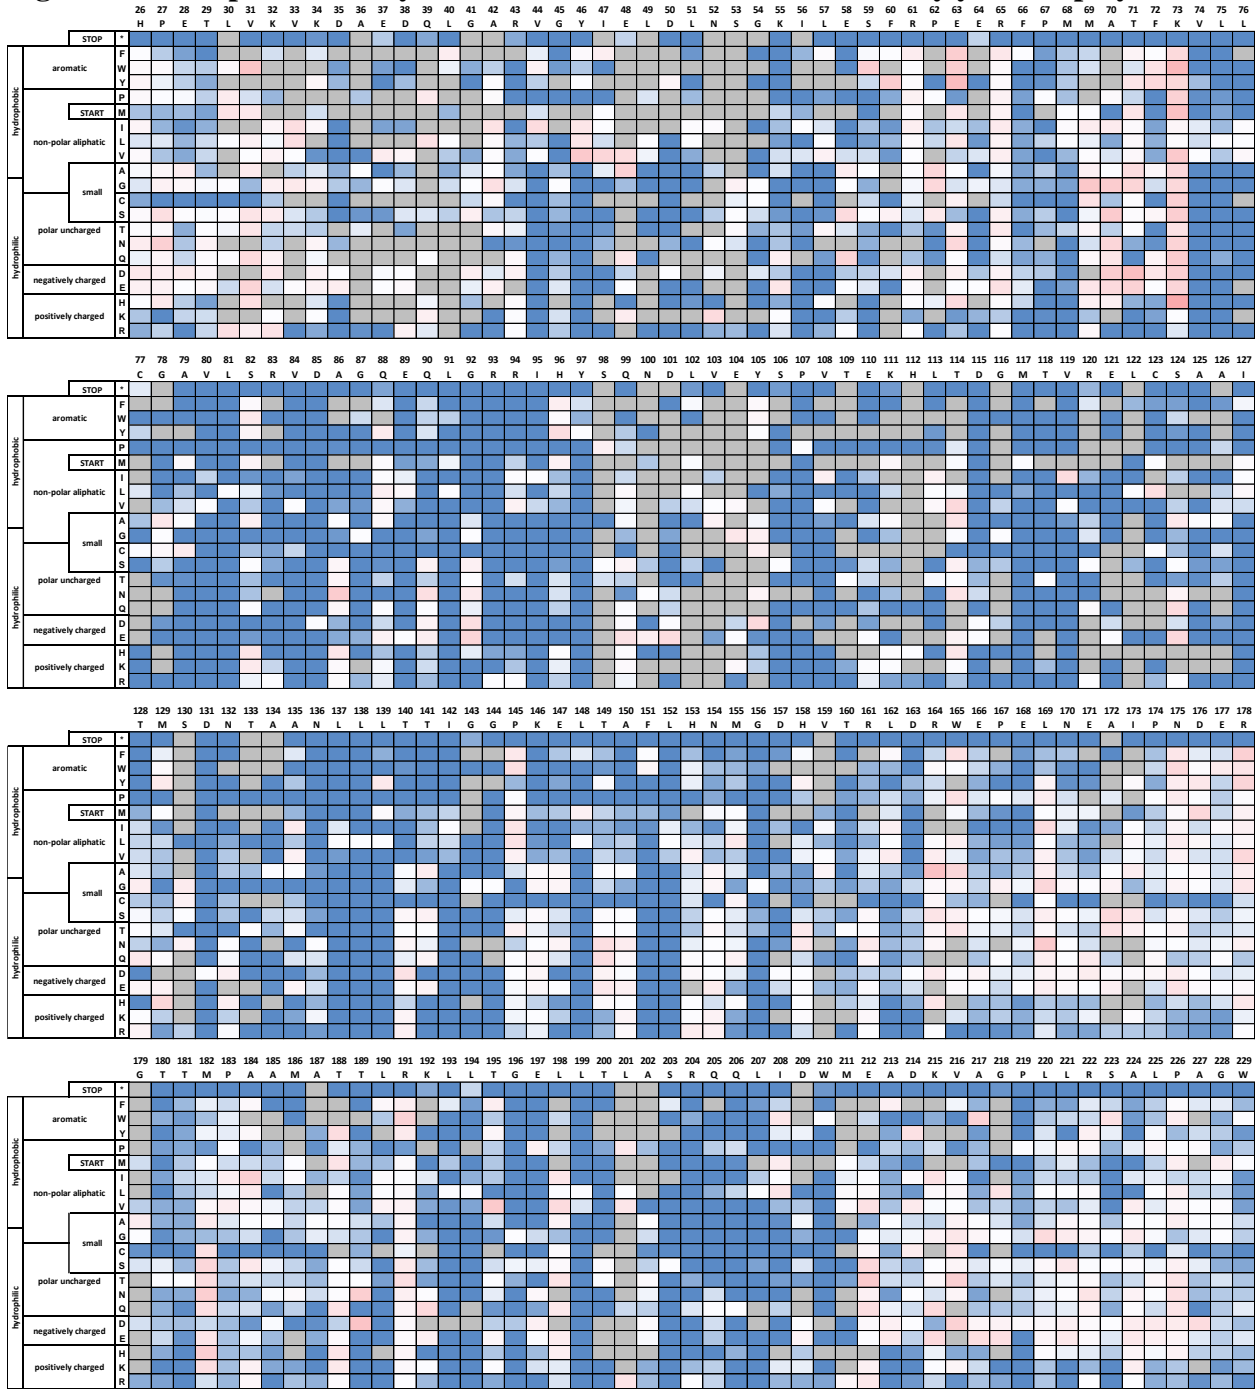



**Fig. S3: Heatmap of solubility score of TEM-1.1 variants screened by TAT export.**

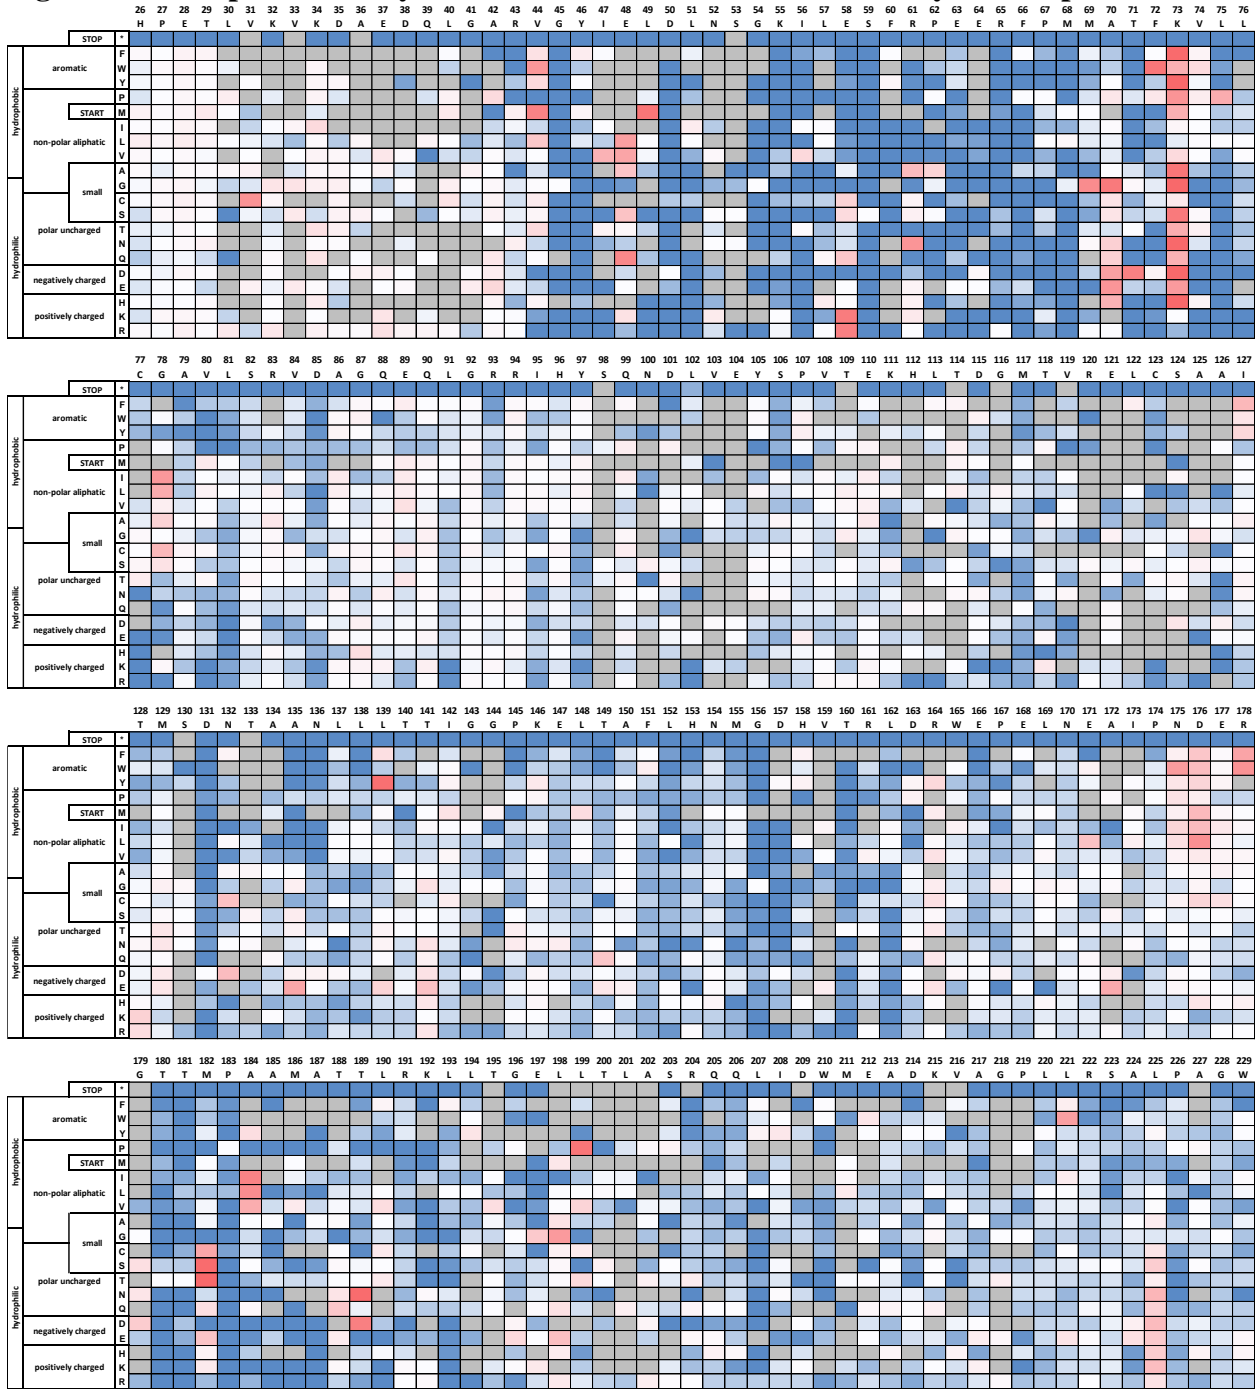

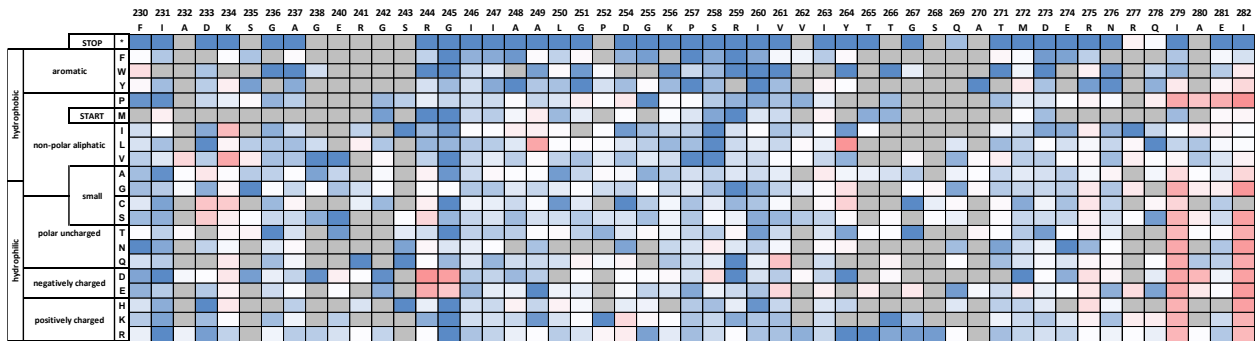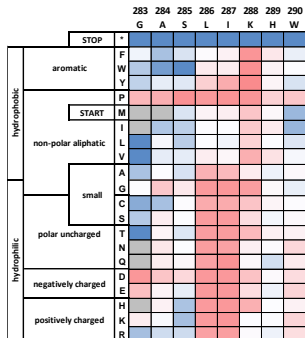

### Solubility Score Key

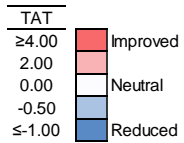

<12 reference counts:  


**Fig. S4: Heatmap of solubility score of LGK variants screened by yeast display.**

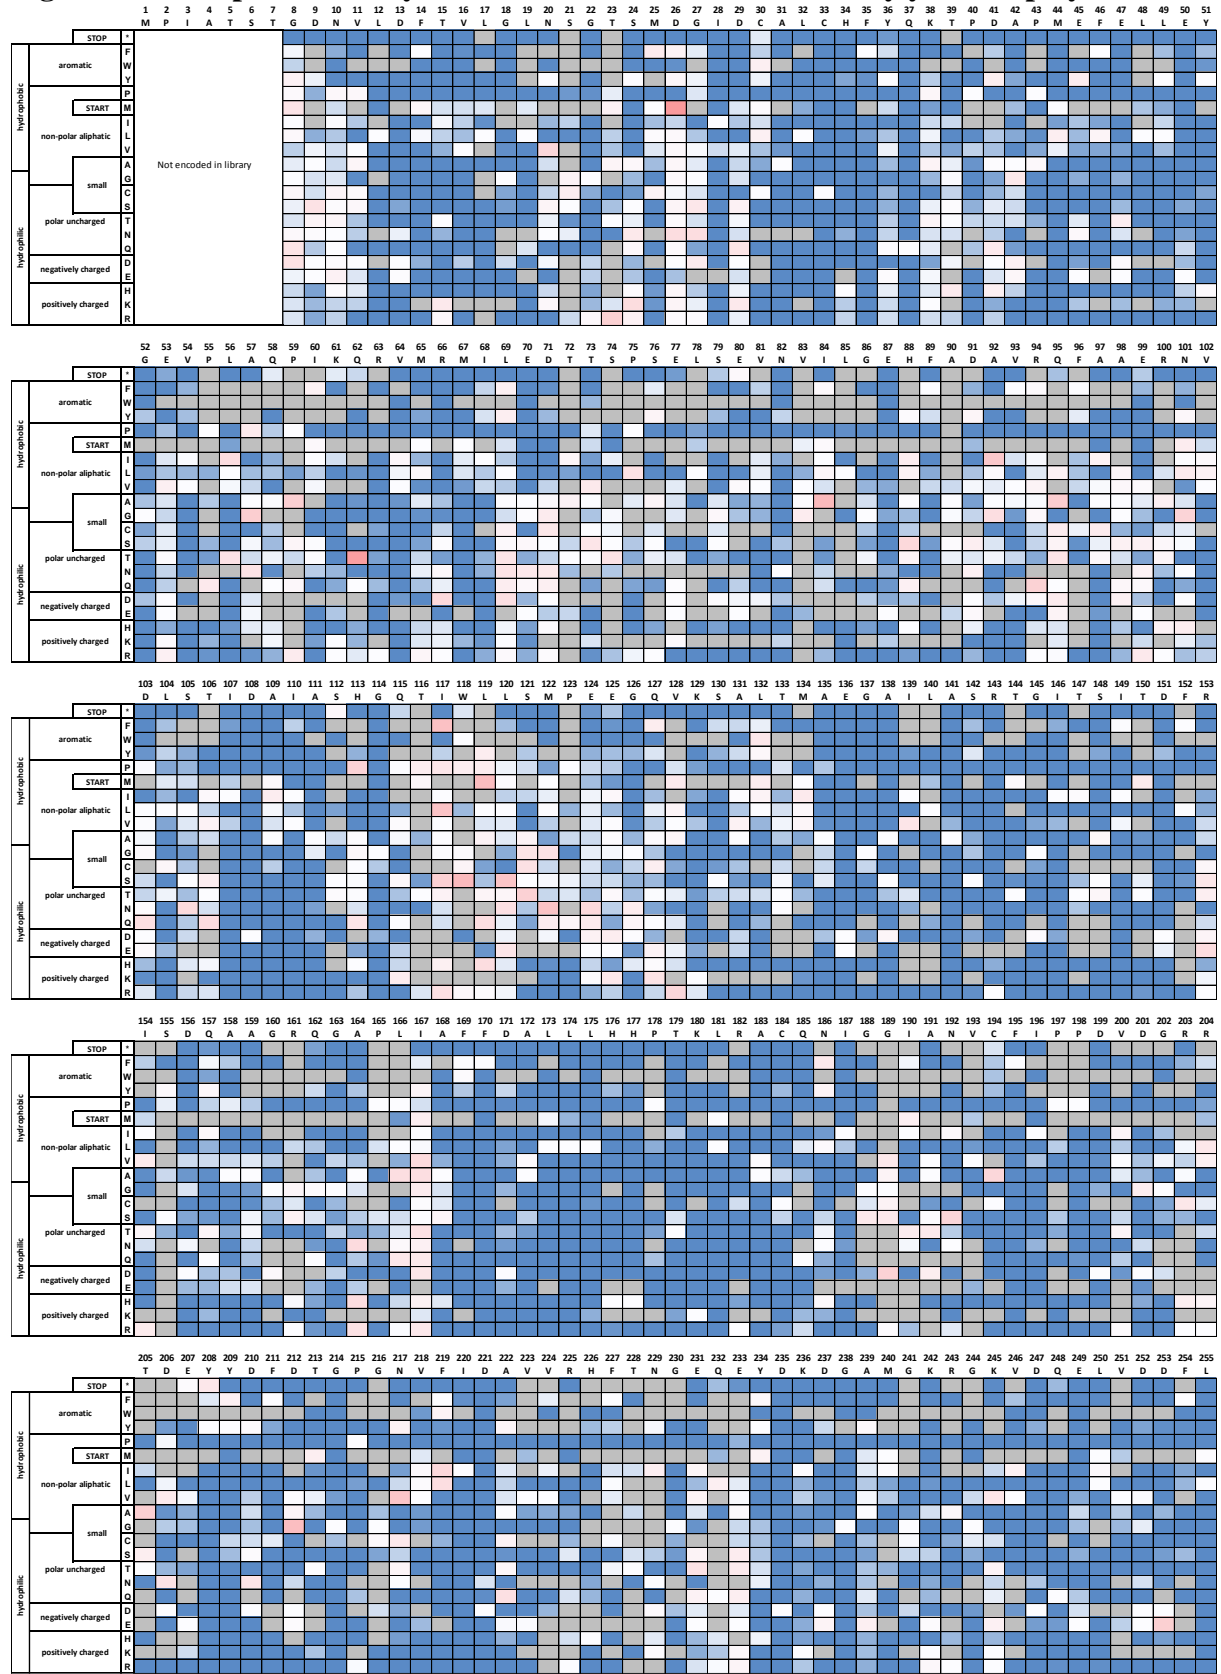

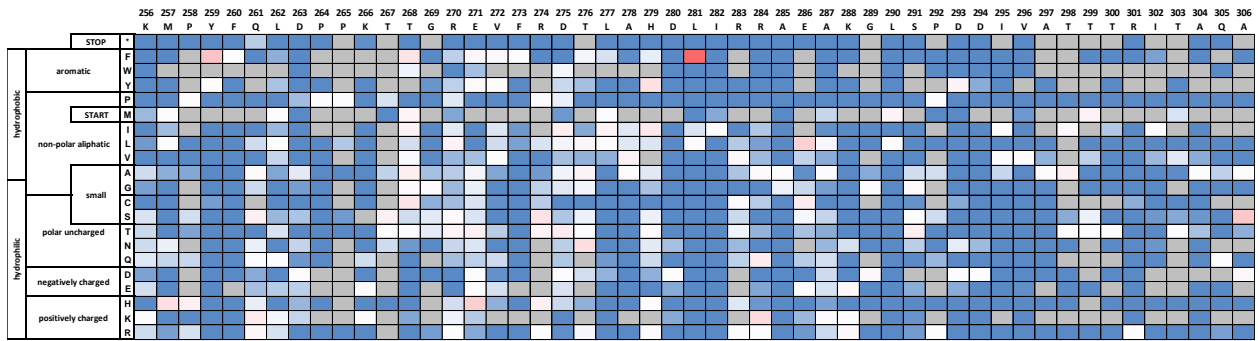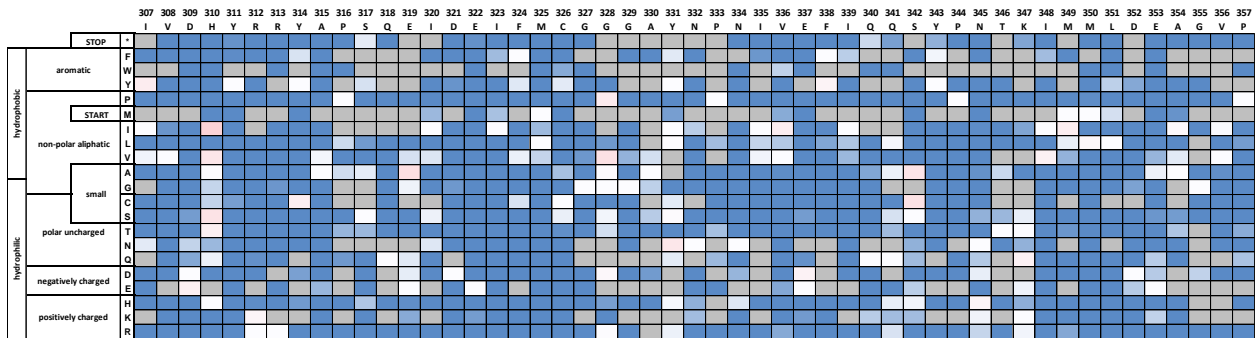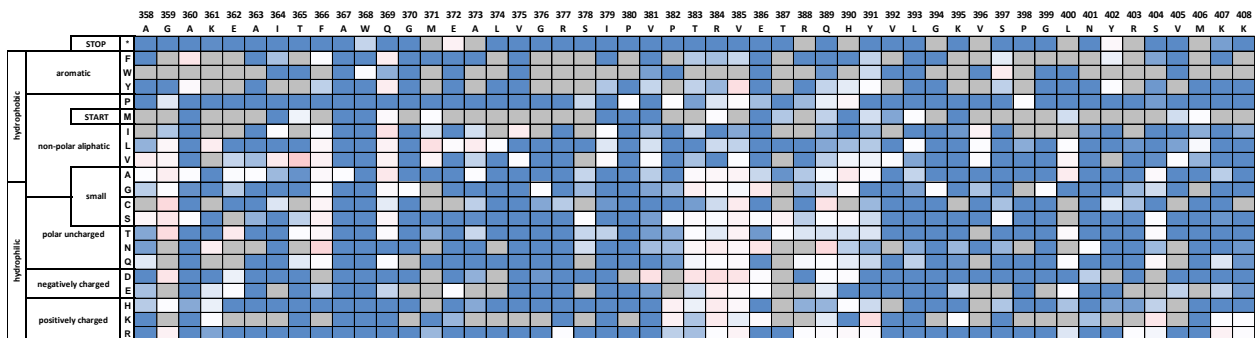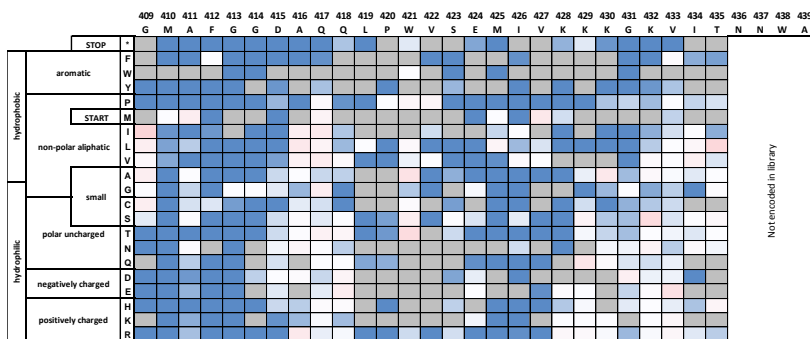

### Solubility Score Key

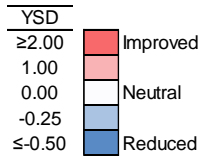

<12 reference counts:

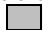

**Fig. S5: Heatmap of solubility score of LGK variants selected by TAT export.**

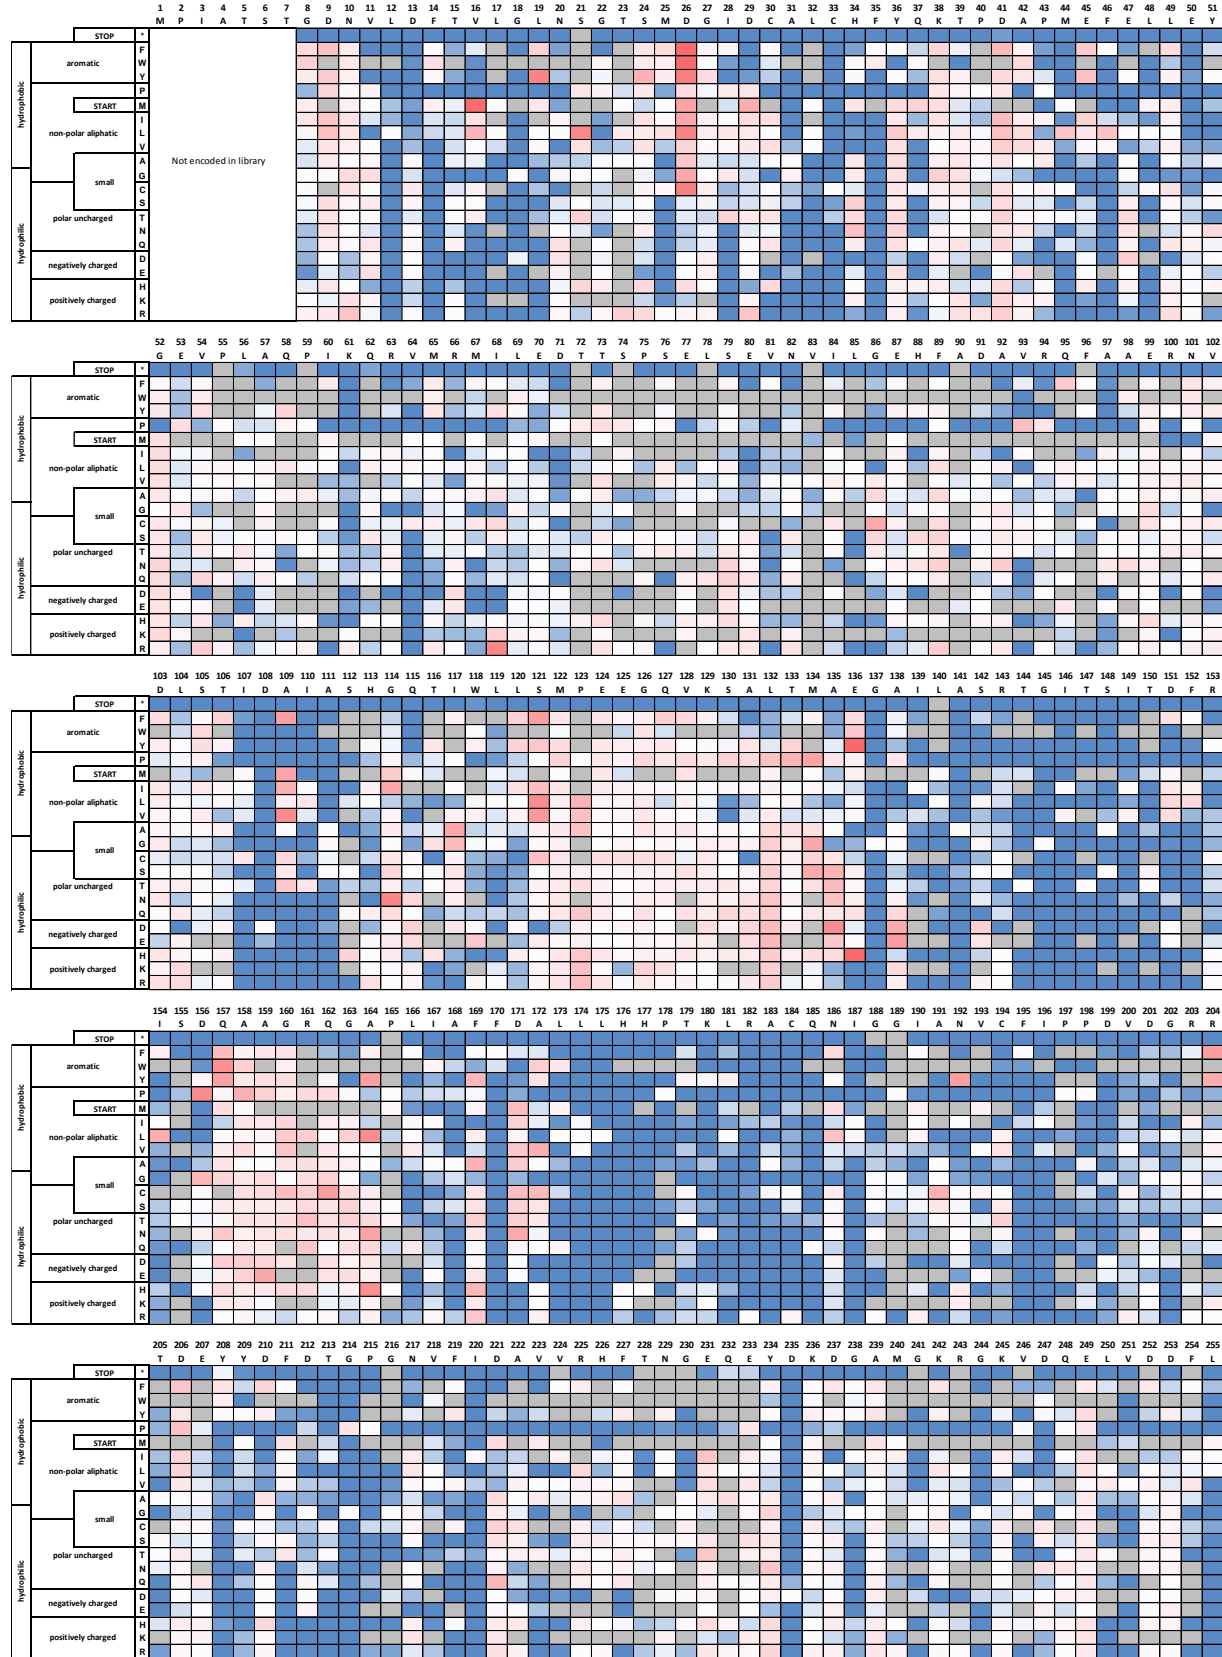





**Fig. S6: Correspondence between enrichment ratios for experimental replicates.** A,B) LGK from residues 331 and 435 for the (A.) TAT genetic selection and (B.) YSD screen, respectively. C,D,E) TEM-1.1 from residues 88 and 175 for (C.) YSD, (D.) two TAT replicates performed on the same day, and (E.) the same two TAT replicates compared to a replicate performed on a different day. Replicates used in Figures B,C, and E are taken six months apart by different individuals. Red line indicates a theoretical estimation of error at a confidence of 2 standard deviations. Correlation coefficient for all mutations and mutations with at least 100 reference counts inset on each graph.

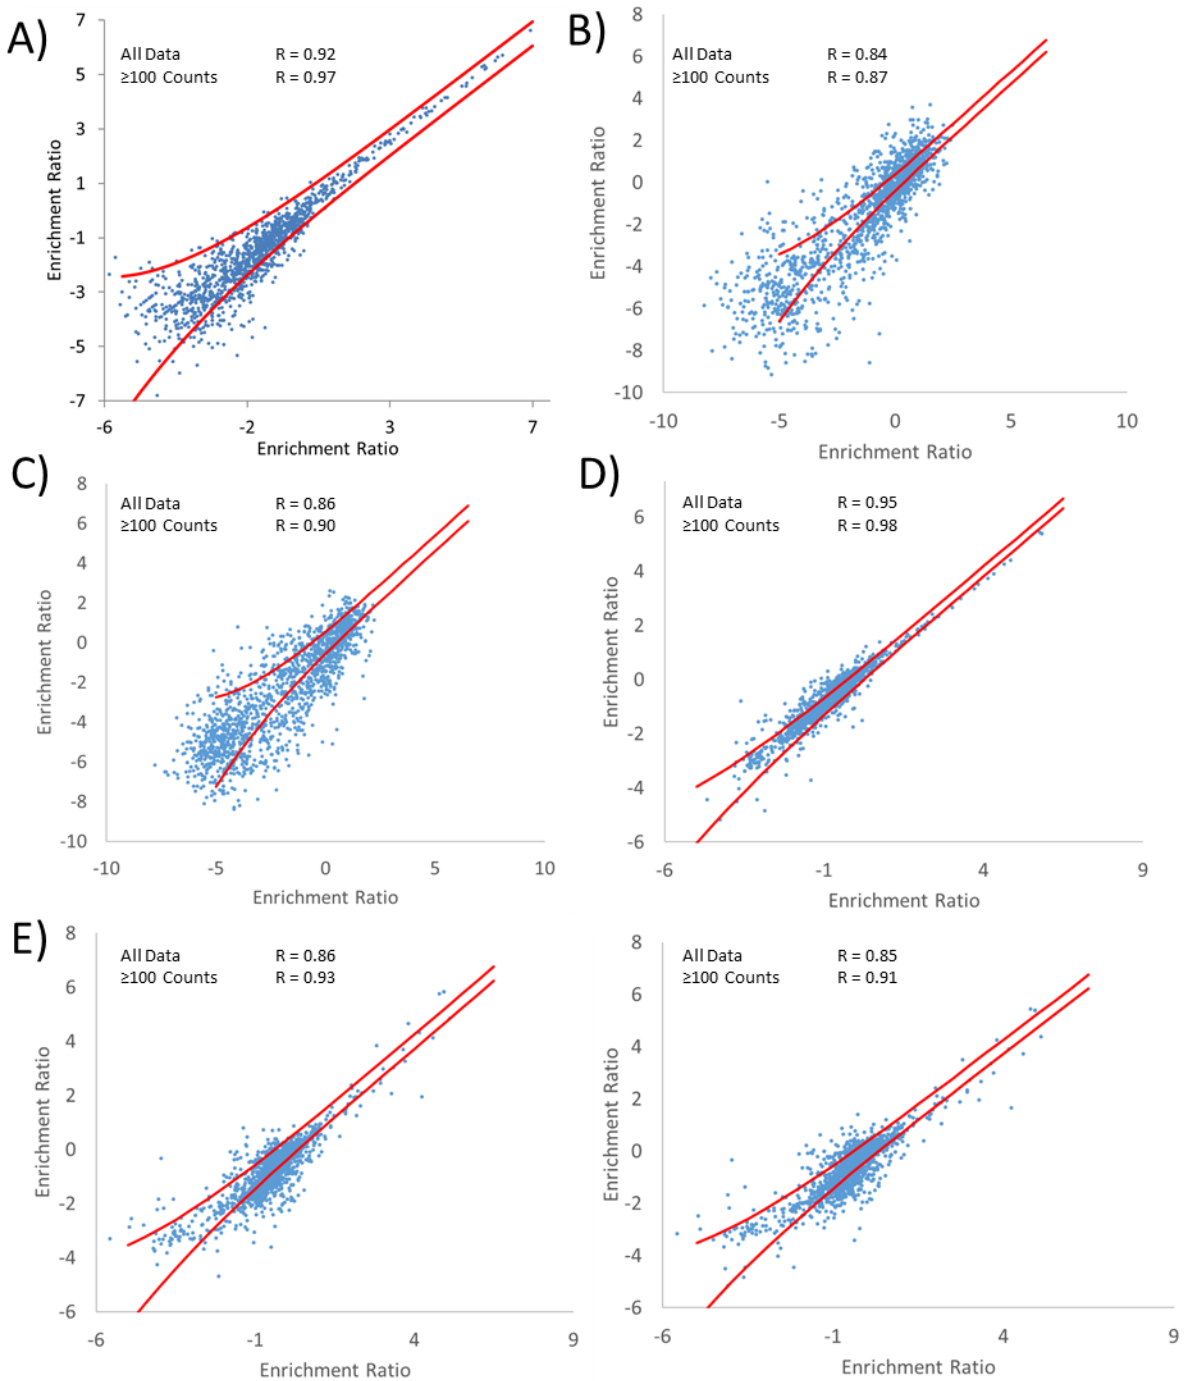

**Fig. S7: Replicate fitness measurements for synonymous mutations to the wild-type sequence for the LGK TAT dataset from residues 331 to 435.** Blue symbols are mutations represented at under 30 counts in the unselected population, whereas red symbols denote mutations represented 30 or more times in the unselected population.

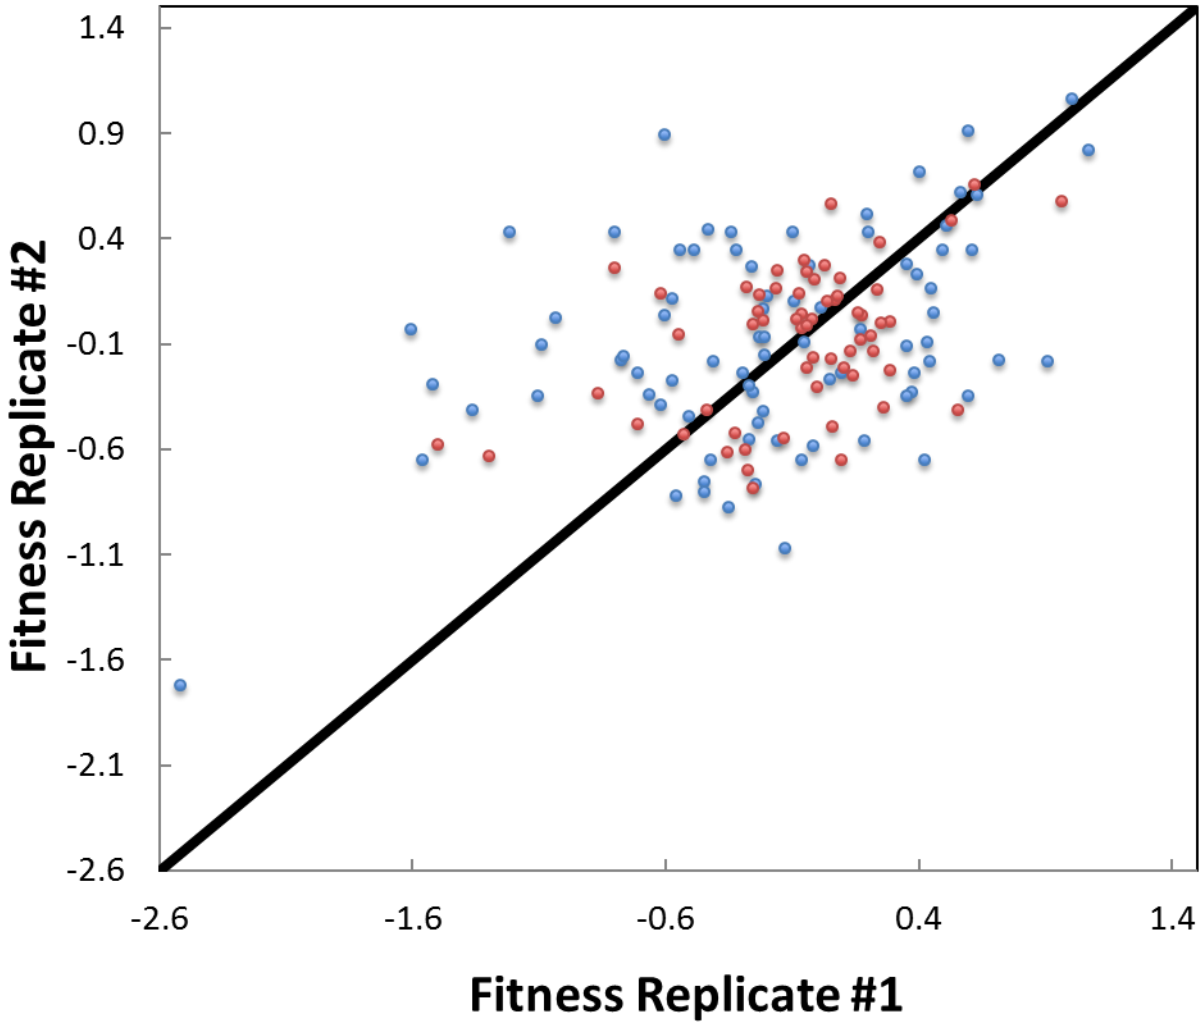

**Fig S8: Distribution of fitness for synonymous mutations to wild-type sequence used in solubility screens and selection. (a.-b.)** Data is shown as closed circles (blue – LGK; red – TEM-1.1), while lines are Gaussian best-fits. Panels are for **(a.)** YSD, and **(b.)** TAT genetic selection. **(c.-d.)** Volcano plots of unselected counts as a function of solubility score for **(c.)** YSD screen for LGK, and **(d.)** YSD screen for TEM-1.1.

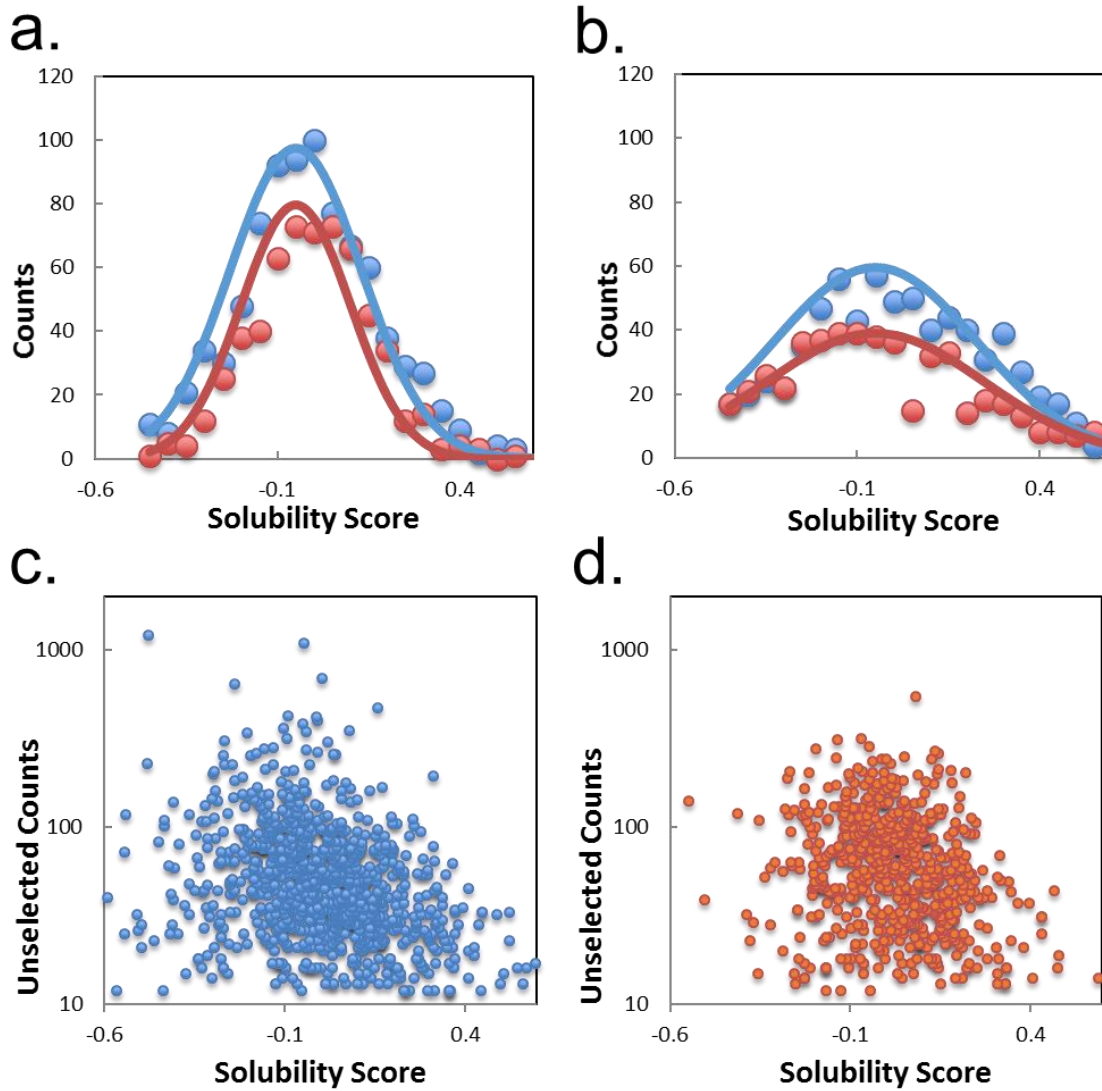

**Fig. S9: Nonsense versus missense distributions for the TAT selection.** An unpaired t-test with Welch's correction was performed between the fitness metrics for nonsense and missense mutations of each enzyme (n=331 and 6386 for nonsense and missense mutations in LGK respectively, n=227 and 3976 for nonsense and missense mutations in TEM-1.1 respectively).

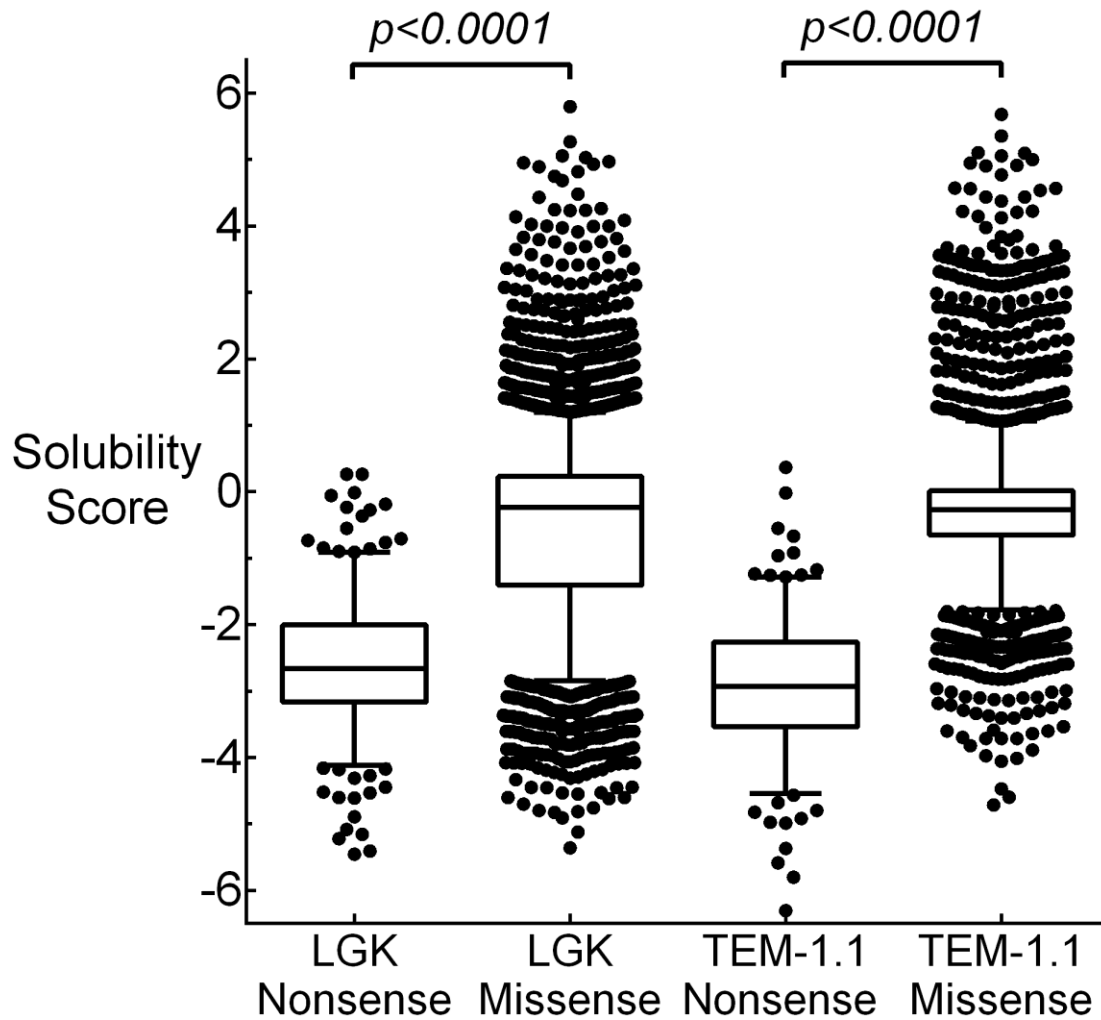

**Fig. S10: Fraction of mutations above lower bounds versus contact number for TAT export.** An unpaired t-test with Welch's correction was performed between each bin.

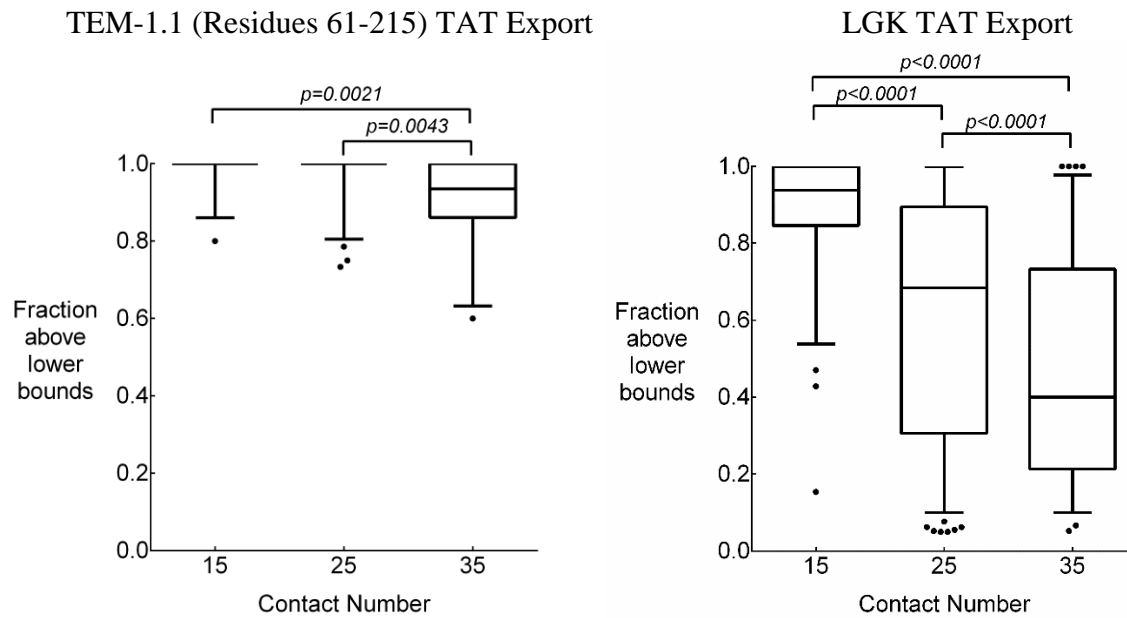

**Fig. S11: Linear regressions of solubility versus functional datasets for LGK for (a.) YSD, and (b.) TAT genetic selection.** The second selection using LGK.1 as the starting construct from Klesmith et. al. (3) was used as the functional dataset comparison for the solubility screens (denoted as “Selection Two” on the X-axis).

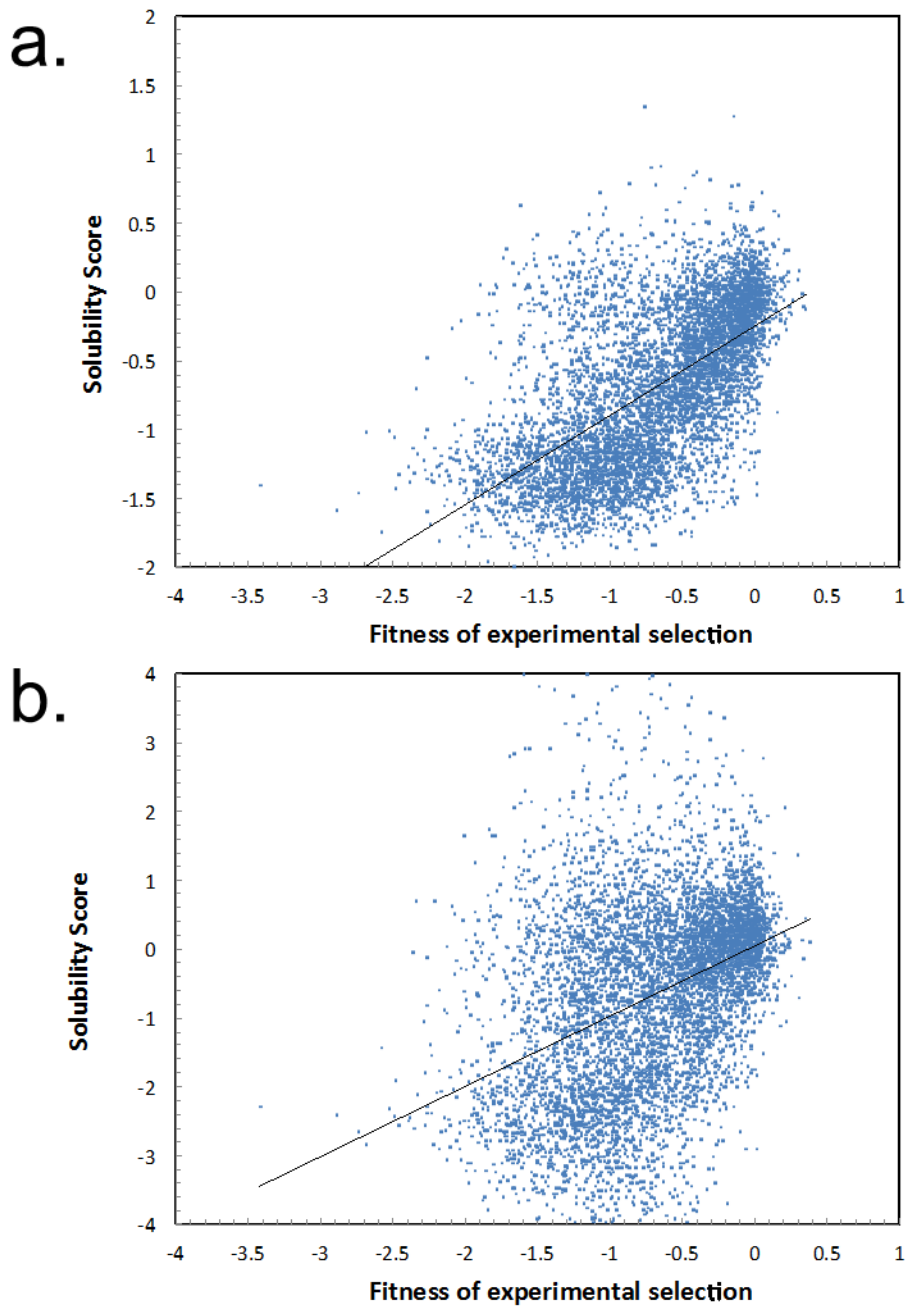

**Fig. S12: Linear regressions of solubility versus functional datasets for TEM-1.1 positions 61-215 (Ambler sequencing convention) for (a.) YSD and (b.) TAT genetic selection.** Fitness values derived from Firnberg et. al.(20) were used for the functional dataset comparison for the solubility screens.

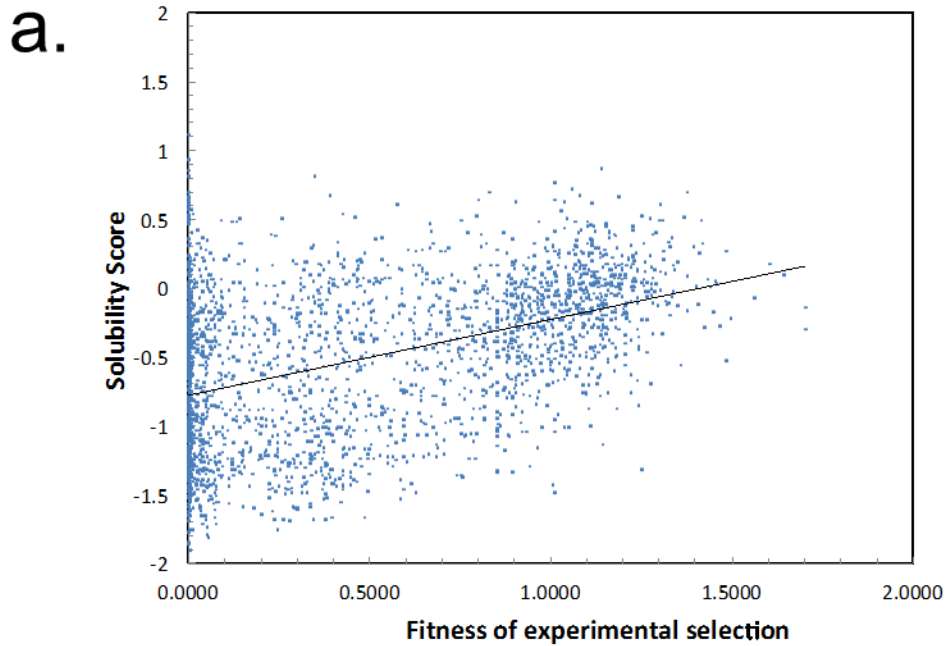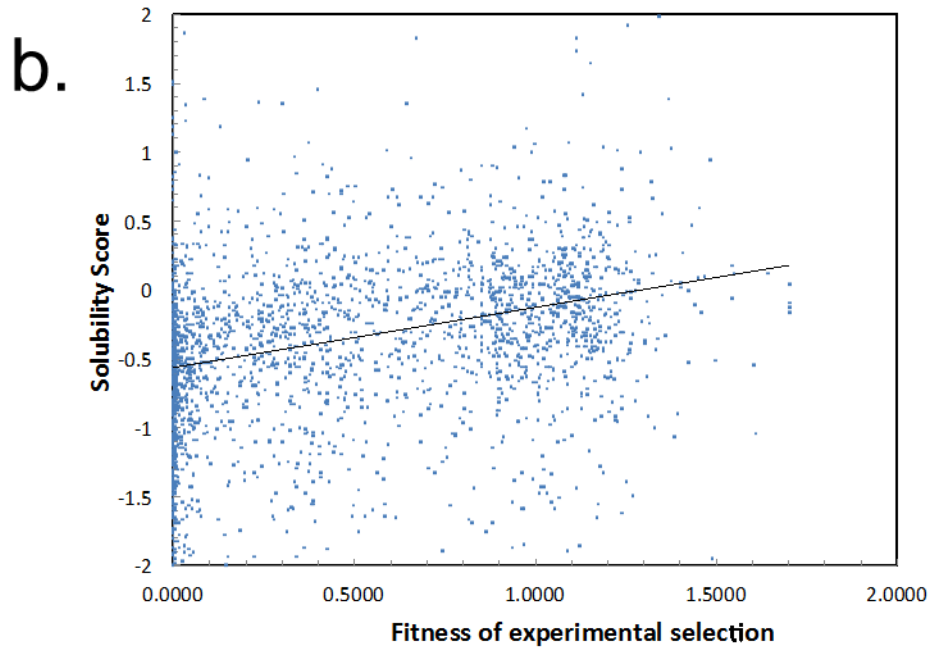



**Table S1: Sorting statistics for LGK and TEM-1.1 libraries.** NS: samples not sorted.

| Enzyme  | Tile Number | Replicate | Method        | Tile Length (AA) | Events Collected | Percent Sorted (Display) | Percent Sorted (Top) | Theoretical DNA Library Diversity | Fold Oversampling |
|---------|-------------|-----------|---------------|------------------|------------------|--------------------------|----------------------|-----------------------------------|-------------------|
| LGK     | 1           | 1         | Yeast Display | 103              | 600,000          | 23.7                     | 7.7                  | 6,592                             | 91                |
| LGK     | 2           | 1         | Yeast Display | 110              | 700,000          | 25.8                     | 5.2                  | 7,040                             | 99                |
| LGK     | 3           | 1         | Yeast Display | 110              | 700,000          | 21.8                     | 6.8                  | 7,040                             | 99                |
| LGK     | 4           | 1         | Yeast Display | 105              | 700,000          | 19.6                     | 4.6                  | 6,720                             | 104               |
| LGK     | 4           | 2         | Yeast Display | 105              | 500,246          | NS                       | 5.0                  | 6,720                             | 74                |
| TEM-1.1 | 1           | 1         | Yeast Display | 87               | 500,000          | 43.0                     | 5.4                  | 5,568                             | 90                |
| TEM-1.1 | 2           | 1         | Yeast Display | 88               | 500,000          | 48.4                     | 6.2                  | 5,632                             | 89                |
| TEM-1.1 | 2           | 2         | Yeast Display | 88               | 486,000          | NS                       | 5.0                  | 5,632                             | 86                |
| TEM-1.1 | 3           | 1         | Yeast Display | 88               | 500,000          | 50.3                     | 6.0                  | 5,632                             | 89                |

**Table S2: Deep sequencing library statistics for the yeast display screens.**

| Screen                                                     | Yeast Display |         |         |         |         |         |         |         |           |         |         |         |         |           |         |         |      |
|------------------------------------------------------------|---------------|---------|---------|---------|---------|---------|---------|---------|-----------|---------|---------|---------|---------|-----------|---------|---------|------|
| Enzyme                                                     | LGK           |         |         |         |         |         |         |         |           | TEM-1.1 |         |         |         |           |         |         |      |
| Tile Number                                                | 1             |         | 2       |         | 3       |         | 4       |         |           | 1       |         | 2       |         | 3         |         |         |      |
| Sort Population                                            | Display       | Top     | Display | Top     | Display | Top     | Display | Top     | Replicate | Display | Top     | Display | Top     | Replicate | Display | Top     |      |
| Number of mutated codons                                   | 103           |         | 110     |         | 110     |         | 105     |         |           | 87      |         | 88      |         | 88        |         |         |      |
| Reference sequencing reads post quality filter             | 607,904       |         | 469,478 |         | 396,561 |         | 259,784 |         | 494,743   | 307,817 |         | 417,079 |         | 1,258,917 | 413,919 |         |      |
| Selected sequencing reads post quality filter              | 363,962       | 512,699 | 322,740 | 254,035 | 329,005 | 333,191 | 199,535 | 288,638 | 423,415   | 288,082 | 355,306 | 491,648 | 660,166 | 776,914   | 531,726 | 441,713 |      |
| <b>Percent of mutant codons with:</b>                      |               |         |         |         |         |         |         |         |           |         |         |         |         |           |         |         |      |
| 1-bp substitution                                          | 100.0         |         | 100.0   |         | 99.7    |         | 99.7    |         | 99.9      |         | 99.6    |         | 99.7    |           | 100.0   |         | 99.7 |
| 2-bp substitution                                          | 69.1          |         | 79.8    |         | 78.6    |         | 82.0    |         | 85.0      |         | 81.2    |         | 88.0    |           | 88.1    |         | 83.4 |
| 3-bp substitution                                          | 63.8          |         | 69.2    |         | 71.4    |         | 75.5    |         | 77.4      |         | 75.0    |         | 79.5    |           | 76.1    |         | 77.4 |
| All substitutions                                          | 71.3          |         | 78.1    |         | 78.5    |         | 81.7    |         | 83.8      |         | 81.2    |         | 86.0    |           | 84.6    |         | 83.1 |
| <b>Percent of reads with:</b>                              |               |         |         |         |         |         |         |         |           |         |         |         |         |           |         |         |      |
| No nonsynonymous mutations                                 | 46.5          |         | 45.3    |         | 40.1    |         | 35.1    |         | 31.8      |         | 43.4    |         | 29.2    |           | 28.1    |         | 30.2 |
| One nonsynonymous mutation                                 | 47.3          |         | 41.7    |         | 51.5    |         | 53.6    |         | 46.4      |         | 50.0    |         | 58.3    |           | 52.7    |         | 60.1 |
| Multiple nonsynonymous mutations                           | 6.1           |         | 13      |         | 8.3     |         | 11.3    |         | 21.8      |         | 6.6     |         | 12.5    |           | 19.2    |         | 9.7  |
| <b>Coverage of possible single nonsynonymous mutations</b> | 89.5          |         | 90.5    |         | 90.5    |         | 91.8    |         | 92.7      |         | 91.2    |         | 96.9    |           | 96.3    |         | 96.3 |

**Table S3: Deep sequencing library statistics for the TAT pathway selections.**

| Screen                                                     | Tat pathway |         |         |         |         |         |         |           |           |         |
|------------------------------------------------------------|-------------|---------|---------|---------|---------|---------|---------|-----------|-----------|---------|
| Enzyme                                                     | LGK         |         |         |         |         | TEM-1.1 |         |           |           |         |
| Tile Number                                                | 1           | 2       | 3       | 4       |         | 1       | 2       |           | 3         |         |
| Number of mutated codons                                   | 103         | 110     | 110     | 105     |         | 87      | 88      |           | 88        |         |
| Reference sequencing reads post quality filter             | 512,321     | 453,663 | 491,970 | 167,053 |         | 458,755 | 490,299 | 1,114,552 |           | 402,030 |
| Selected sequencing reads post quality filter              | 437,570     | 367,820 | 514,209 | 110,898 | 184,418 | 469,768 | 450,252 | 1,189,544 | 1,006,879 | 525,271 |
| <b>Percent of mutant codons with:</b>                      |             |         |         |         |         |         |         |           |           |         |
| 1-bp substitution                                          | 99.9        | 100.0   | 99.9    | 99.4    |         | 99.7    | 99.6    | 100.0     |           | 99.1    |
| 2-bp substitution                                          | 88.0        | 96.2    | 92.0    | 84.2    |         | 86.0    | 83.6    | 88.2      |           | 79.4    |
| 3-bp substitution                                          | 84.2        | 93.7    | 86.4    | 78.4    |         | 80.8    | 75.0    | 77.7      |           | 72.3    |
| All substitutions                                          | 88.1        | 95.7    | 90.7    | 83.8    |         | 85.8    | 82.2    | 85.4      |           | 79.2    |
| <b>Percent of reads with:</b>                              |             |         |         |         |         |         |         |           |           |         |
| No nonsynonymous mutations                                 | 38.7        | 35.1    | 37.6    | 35.0    |         | 28.2    | 28.3    | 25.7      |           | 27.1    |
| One nonsynonymous mutation                                 | 51.8        | 53.9    | 52.2    | 52.4    |         | 61.2    | 63.9    | 56.8      |           | 62.1    |
| Multiple nonsynonymous mutations                           | 9.5         | 11.1    | 10.2    | 12.6    |         | 10.5    | 7.8     | 17.5      |           | 10.7    |
| <b>Coverage of possible single nonsynonymous mutations</b> | 96.6        | 99.4    | 94.8    | 85.4    |         | 93.3    | 92.6    | 95.5      |           | 90.7    |

**Table S4: Standard deviation for synonymous mutations at different depths of coverage.**

| Screen                                | YSD  | YSD     | TAT  | TAT     |
|---------------------------------------|------|---------|------|---------|
| Protein                               | LGK  | TEM-1.1 | LGK  | TEM-1.1 |
| Depth of Coverage (Unselected Counts) |      |         |      |         |
| All Data                              | 0.24 | 0.18    | 0.43 | 0.37    |
| >12 & <30 counts                      | 0.30 | 0.23    | 0.64 | 0.49    |
| >=30 counts                           | 0.19 | 0.17    | 0.29 | 0.32    |
| >29 & <100 counts                     | 0.18 | 0.16    | 0.31 | 0.36    |
| >99 counts                            | 0.20 | 0.17    | 0.19 | 0.24    |

**Table S5: Correlation coefficients between solubility scores and fitness measurements.**

| Screen                                                          | YSD  | YSD      | TAT  | TAT      | YSD     | TAT     |
|-----------------------------------------------------------------|------|----------|------|----------|---------|---------|
| Protein                                                         | LGK  | TEM-1.1* | LGK  | TEM-1.1* | TEM-1.1 | TEM-1.1 |
| Depth of Coverage<br>(Unselected Counts)                        |      |          |      |          |         |         |
| All Data                                                        | 0.61 | 0.45     | 0.39 | 0.22     | 0.26    | 0.13    |
| >12 & <30 counts                                                | 0.54 | 0.45     | 0.36 | 0.14     | 0.32    | 0.18    |
| >=30 counts                                                     | 0.63 | 0.45     | 0.40 | 0.24     | 0.24    | 0.12    |
| *Considering positions 61-215 using Ambler sequence convention. |      |          |      |          |         |         |

**Table S6: Known stabilizing mutations in TEM-1.**

| <b>Position</b> | <b>Mutation</b> | <b><math>\Delta T_m</math> (<math>^{\circ}\text{C}</math>)</b> | <b>Solubility Score YSD</b> | <b>Solubility Score TAT</b> | <b>Reference</b> |
|-----------------|-----------------|----------------------------------------------------------------|-----------------------------|-----------------------------|------------------|
| 31              | V31R            | 3.2                                                            | 0.19                        | -0.31                       | (21)             |
| 60              | F60Y            | 2.6                                                            | 0.64                        | 0.21                        | (21)             |
| 62              | P62S            | 1                                                              | 0.27                        | -0.01                       | (22)             |
| 78              | G78A            | 1.5                                                            | 0.29                        | 1.42                        | (21)             |
| 82              | S82H            | 2.2                                                            | 0.32                        | -0.21                       | (21)             |
| 92              | G92D            | 4.1                                                            | 0.41                        | 0.00                        | (21)             |
| 104             | E104K           | 1.7                                                            | 0.07                        | -0.39                       | (23)             |
| 120             | R120G           | 1.8                                                            | -0.09                       | -0.94                       | (24)             |
| 147             | E147G           | 2.6                                                            | 0.12                        | -0.43                       | (24)             |
| 153             | H153R           | 3.3                                                            | 0.23                        | 0.09                        | (24)             |
| 182             | M182T           | 5                                                              | 0.43                        | 5.10                        | (24)             |
| 201             | L201P           | 1.4                                                            | 0.26                        | -0.19                       | (24)             |
| 208             | I208M           | 1.1                                                            | 0.22                        | -0.32                       | (25)             |
| 224             | A224V           | 3.1                                                            | 0.21                        | -0.38                       | (22)             |
| 235             | S235A           | 1.7                                                            | -0.06                       | -0.42                       | (26)             |
| 265             | T265M           | 1.6                                                            | 0.30                        | -0.70                       | (7)              |
| 275             | R275L           | 5                                                              | 0.59                        | -0.04                       | (22)             |
| 275             | R275Q           | 2                                                              | 0.50                        | 0.21                        | (7)              |
| 276             | N276D           | 1.3                                                            | 0.29                        | 0.24                        | (7)              |

**Table S7: Known stabilizing mutations in LGK.** All mutations and associated biophysical data come from (3). NS – mutation is not seen in the dataset.

| <b>Position</b> | <b>Mutation</b> | <b><math>\Delta T_m</math> (°C)</b> | <b>Solubility Score YSD</b> | <b>Solubility Score TAT</b> |
|-----------------|-----------------|-------------------------------------|-----------------------------|-----------------------------|
| 75              | P75L            | 1.4                                 | 0.36                        | -0.50                       |
| 94              | R94H            | 1.9                                 | -0.10                       | -0.72                       |
| 113             | H113G           | 4.9                                 | 0.07                        | -0.75                       |
| 135             | A135G           | 2.6                                 | -0.17                       | -0.75                       |
| 140             | L140I           | 2.2                                 | NS                          | -0.55                       |
| 167             | I167H           | 9.8                                 | 0.16                        | -0.58                       |
| 194             | C194T           | 6.0                                 | -0.43                       | 1.50                        |
| 212             | D212A           | 1.4                                 | 0.11                        | -0.67                       |
| 268             | T268C           | 4.0                                 | 0.32                        | -0.75                       |
| 306             | A306S           | 1.1                                 | 0.72                        | -0.25                       |
| 359             | G359R           | 1.1                                 | 0.15                        | -0.71                       |
| 369             | Q369L           | 3.4                                 | 0.15                        | -0.75                       |

**Table S8: Number of hits from the solubility dataset and *in vitro* datasets at different threshold values.**

| Solubility Score           |        |         | Overall Dataset |          | <i>in vitro</i> dataset |          |                             |
|----------------------------|--------|---------|-----------------|----------|-------------------------|----------|-----------------------------|
| Cutoff                     | Screen | Protein | Hits            | Non Hits | Hits                    | Non Hits | p-value (Fisher exact test) |
| 0.15                       | YSD    | LGK     | 317             | 6788     | 6                       | 5        | 3.20E-06                    |
| 0.24 (1 sigma all data)    | YSD    | LGK     | 182             | 6923     | 3                       | 8        | 0.002                       |
| 0.19 (1 sigma >=30 counts) | YSD    | LGK     | 258             | 6847     | 3                       | 8        | 0.007                       |
| 0.38 (2 sigma >=30 counts) | YSD    | LGK     | 76              | 7029     | 1                       | 10       | 0.11                        |
| 0.15                       | YSD    | TEM-1.1 | 632             | 3981     | 15                      | 4        | 2.90E-10                    |
| 0.18 (1 sigma all data)    | YSD    | TEM-1.1 | 552             | 4061     | 15                      | 4        | 4.20E-11                    |
| 0.17 (1 sigma >=30 counts) | YSD    | TEM-1.1 | 573             | 4040     | 15                      | 4        | 7.20E-11                    |
| 0.34 (2 sigma >=30 counts) | YSD    | TEM-1.1 | 293             | 4320     | 5                       | 14       | 0.005                       |
| 0.15                       | TAT    | LGK     | 1944            | 5212     | 1                       | 11       | 0.2                         |
| 0.43 (1 sigma all data)    | TAT    | LGK     | 1225            | 5931     | 1                       | 11       | 0.7                         |
| 0.29 (1 sigma >=30 counts) | TAT    | LGK     | 1561            | 5595     | 1                       | 11       | 0.48                        |
| 0.58 (2 sigma >=30 counts) | TAT    | LGK     | 946             | 6210     | 1                       | 11       | 1                           |
| 0.15                       | TAT    | TEM-1.1 | 772             | 3695     | 5                       | 14       | 0.36                        |
| 0.37 (1 sigma all data)    | TAT    | TEM-1.1 | 484             | 3983     | 2                       | 17       | 1                           |
| 0.32 (1 sigma >=30 counts) | TAT    | TEM-1.1 | 533             | 3934     | 2                       | 17       | 1                           |
| 0.64 (2 sigma >=30 counts) | TAT    | TEM-1.1 | 314             | 4153     | 2                       | 17       | 0.39                        |



**Table S9: PSSM classifier probabilities independent of a solubility screen.**

|                |      | Classifier Probabilities |         |                      |             |
|----------------|------|--------------------------|---------|----------------------|-------------|
|                |      | n                        | Neutral | Slightly Deleterious | Deleterious |
| PSSM (TEM-1.1) |      |                          |         |                      |             |
| TOTAL          | 4997 | 32%                      | 12%     | 56%                  |             |
| ≥3             | 187  | 69%                      | 11%     | 20%                  |             |
| ≥0             | 1076 | 66%                      | 14%     | 20%                  |             |
| PSSM (LGK)     |      |                          |         |                      |             |
| TOTAL          | 7701 | 28%                      | 45%     | 27%                  |             |
| ≥3             | 377  | 57%                      | 33%     | 10%                  |             |
| ≥0             | 1966 | 52%                      | 37%     | 12%                  |             |

**Table S10: Classifier probabilities for chemical changes and size changes.**

Classifier Probabilities (TEM-1 YSD)

|                                              | n   | Slightly |             |             |
|----------------------------------------------|-----|----------|-------------|-------------|
|                                              |     | Neutral  | Deleterious | Deleterious |
| Overall Library                              | 637 | 37%      | 8%          | 55%         |
| Chemical Change                              |     |          |             |             |
| Polar/Charged to Polar/Charged               | 195 | 52%      | 11%         | 37%         |
| Charge Reversal                              | 25  | 40%      | 16%         | 44%         |
| Polar/Charge to Hydrophobic/Aromatic         | 121 | 44%      | 6%          | 50%         |
| Hydrophobic/Aromatic to Polar/Charged        | 170 | 16%      | 6%          | 78%         |
| To/From Proline                              | 64  | 13%      | 5%          | 83%         |
| Hydrophobic/Aromatic to Hydrophobic/Aromatic | 62  | 63%      | 8%          | 29%         |
| Size Change                                  |     |          |             |             |
| Big to Big                                   | 184 | 41%      | 5%          | 54%         |
| Big to Small                                 | 175 | 30%      | 11%         | 59%         |
| To/From Proline                              | 64  | 13%      | 5%          | 83%         |
| Small to Big                                 | 120 | 49%      | 8%          | 43%         |
| Small to Small                               | 94  | 47%      | 9%          | 45%         |

Classifier Probabilities (LGK-YSD)

|                                              | n   | Slightly |             |             |
|----------------------------------------------|-----|----------|-------------|-------------|
|                                              |     | Neutral  | Deleterious | Deleterious |
| Overall Library                              | 309 | 57%      | 28%         | 15%         |
| Chemical Change                              |     |          |             |             |
| Polar/Charged to Polar/Charged               | 132 | 70%      | 19%         | 11%         |
| Charge Reversal                              | 9   | 33%      | 56%         | 11%         |
| Polar/Charge to Hydrophobic/Aromatic         | 69  | 59%      | 25%         | 16%         |
| Hydrophobic/Aromatic to Polar/Charged        | 42  | 33%      | 38%         | 29%         |
| To/From Proline                              | 14  | 29%      | 29%         | 43%         |
| Hydrophobic/Aromatic to Hydrophobic/Aromatic | 43  | 53%      | 42%         | 5%          |
| Size Change                                  |     |          |             |             |
| Big to Big                                   | 78  | 51%      | 32%         | 17%         |
| Big to Small                                 | 82  | 55%      | 26%         | 20%         |
| To/From Proline                              | 14  | 29%      | 29%         | 43%         |
| Small to Big                                 | 57  | 60%      | 26%         | 14%         |
| Small to Small                               | 78  | 69%      | 26%         | 5%          |

**Table S11: Filters and Bayes analyses for LGK YSD screen.**

| LGK - YSD            |       |               |             |             |                |
|----------------------|-------|---------------|-------------|-------------|----------------|
|                      | Basal | PSSM $\geq 3$ | PSSM Filter | Naïve Bayes | Bayes + Filter |
| n =                  | 309   | 39            | 58          | 242         | 125            |
| Neutral              | 57%   | 82%           | 90%         | 66%         | 77%            |
| Slightly Deleterious | 28%   | 13%           | 7%          | 26%         | 19%            |
| Deleterious          | 15%   | 5%            | 3%          | 8%          | 4%             |

**Table S12: Inner PCR tile primers.** Illumina outer PCR attach point sequences are underlined.

| Name        | Sequence                                                 |
|-------------|----------------------------------------------------------|
| pETCONNKFWD | <u>G</u> TTCAGAGTTCTACAGTCCGACGATCAGGGTCGGCTAGC          |
| pETCONNKREV | CCTTGGCACCCGAGAATTCCAAAGCTTTTGTTCGGATC                   |
| pSALECTFWD  | <u>G</u> TTCAGAGTTCTACAGTCCGACGATCACGTGCGACTGCG          |
| pSALECTREV  | CCTTGGCACCCGAGAATTCCATTAACCAGGGTCTCCG                    |
| LGKTILE1REV | CCTTGGCACCCGAGAATTCCAGCCGTGCGAAGC                        |
| LGKTILE2FWD | <u>G</u> TTCAGAGTTCTACAGTCCGACGATCACCATTGACGCAATC        |
| LGKTILE2REV | CCTTGGCACCCGAGAATTCCACGAACCACTGCGTC                      |
| LGKTILE3FWD | <u>G</u> TTCAGAGTTCTACAGTCCGACGATCGGCAACGTGTTTCATC       |
| LGKTILE3REV | CCTTGGCACCCGAGAATTCCACCACAATATTCGGGTTATA                 |
| LGKTILE4FWD | <u>G</u> TTCAGAGTTCTACAGTCCGACGATCCGGTGGCGCC             |
| TEMTILE1REV | CCTTGGCACCCGAGAATTCCACATGCCATCCGTAAG                     |
| TEMTILE2FWD | <u>G</u> TTCAGAGTTCTACAGTCCGACGATCCCAGTCACAGAAAAGCAT     |
| TEMTILE2REV | CCTTGGCACCCGAGAATTCCATGCCGGGAAGCTAG                      |
| TEMTILE3FWD | <u>G</u> TTCAGAGTTCTACAGTCCGACGATCATTAACTGGCGAACTACTTACT |

**Table S13: Data processing and refinement statistics for LGK G359R crystallographic structure (values in parentheses refer to the high-resolution shell).**

|                                           |                                                                  |
|-------------------------------------------|------------------------------------------------------------------|
| <b>Data Collection</b>                    |                                                                  |
| Space group                               | P4 <sub>1</sub> 2 <sub>1</sub> 2                                 |
| Unit cell (Å)                             | $a = b = 70.06, c = 261.77$<br>$\alpha = \beta = \gamma = 90.00$ |
| Wavelength (Å)                            | 0.9795                                                           |
| Resolution range (Å)                      | 46.33 – 1.80 (1.90 – 1.80)                                       |
| Total observations                        | 411319                                                           |
| Total unique observations                 | 61638                                                            |
| I/ $\sigma$ I                             | 9.4 (1.7)                                                        |
| Completeness (%)                          | 99.9 (100.0)                                                     |
| R <sub>merge</sub>                        | 0.133 (1.045)                                                    |
| R <sub>pim</sub>                          | 0.056 (0.428)                                                    |
| Redundancy                                | 6.7 (6.9)                                                        |
| <b>Refinement Statistics</b>              |                                                                  |
| Resolution (Å)                            | 43.08-1.80                                                       |
| Reflections (total)                       | 61556                                                            |
| Reflections (test)                        | 3097                                                             |
| Total atoms refined                       | 3830                                                             |
| Solvent                                   | 460                                                              |
| R <sub>work</sub> (R <sub>free</sub> )    | 0.18 (0.21)                                                      |
| RMSDs Bond lengths (Å) / angles (°)       | 0.008/0.828                                                      |
| Ramachandran plot<br>(Favored/allowed(%)) | 97.2/2.6                                                         |
| Average B, all atoms (Å <sup>2</sup> )    | 24.0                                                             |

## SI References:

1. Wrenbeck EE, *et al.* (2016) Plasmid-based one-pot saturation mutagenesis. *Nat Meth* advance online publication.
2. Ambler RP, *et al.* (1991) A standard numbering scheme for the class A beta-lactamases. *Biochemical Journal* 276(Pt 1):269-270.
3. Klesmith JR, Bacik JP, Michalczyk R, & Whitehead TA (2015) Comprehensive Sequence-Flux Mapping of a Levoglucosan Utilization Pathway in *E. coli*. *ACS Synth Biol* 4(11):1235-1243.
4. Chao G, *et al.* (2006) Isolating and engineering human antibodies using yeast surface display. *Nat. Protocols* 1(2):755-768.
5. Whitehead TA, *et al.* (2012) Optimization of affinity, specificity and function of designed influenza inhibitors using deep sequencing. *Nat Biotechnol* 30(6):543-548.
6. Kowalsky CA, *et al.* (2015) High-resolution sequence-function mapping of full-length proteins. *PLoS One* 10(3):e0118193.
7. Fowler DM, Araya CL, Gerard W, & Fields S (2011) Enrich: software for analysis of protein function by enrichment and depletion of variants. *Bioinformatics* 27(24):3430-3431.
8. Altschul SF, Gish W, Miller W, Myers EW, & Lipman DJ (1990) Basic local alignment search tool. *Journal of Molecular Biology* 215(3):403-410.
9. Li W & Godzik A (2006) Cd-hit: a fast program for clustering and comparing large sets of protein or nucleotide sequences. *Bioinformatics* 22(13):1658-1659.
10. Edgar RC (2004) MUSCLE: multiple sequence alignment with high accuracy and high throughput. *Nucleic Acids Research* 32(5):1792-1797.
11. Kabsch W & Sander C (1983) Dictionary of protein secondary structure: Pattern recognition of hydrogen-bonded and geometrical features. *Biopolymers* 22(12):2577-2637.
12. Altschul SF, Gertz EM, Agarwala R, Schäffer AA, & Yu Y-K (2009) PSI-BLAST pseudocounts and the minimum description length principle. *Nucleic Acids Research* 37(3):815-824.
13. Bienick MS, *et al.* (2014) The interrelationship between promoter strength, gene expression, and growth rate. *PLoS One* 9(10):e109105.
14. Battye TGG, Kontogiannis L, Johnson O, Powell HR, & Leslie AGW (2011) iMOSFLM: a new graphical interface for diffraction-image processing with MOSFLM. *Acta Crystallographica Section D* 67(4):271-281.
15. Evans P (2006) Scaling and assessment of data quality. *Acta Crystallographica Section D* 62(1):72-82.
16. Emsley P & Cowtan K (2004) Coot: model-building tools for molecular graphics. *Acta Crystallogr D Biol Crystallogr* 60(Pt 12 Pt 1):2126-2132.
17. Afonine PV, *et al.* (2012) Towards automated crystallographic structure refinement with phenix.refine. *Acta Crystallographica Section D: Biological Crystallography* 68(Pt 4):352-367.
18. Chen VB, *et al.* (2010) MolProbity: all-atom structure validation for macromolecular crystallography. *Acta Crystallographica Section D* 66(1):12-21.
19. DeLano WL (2002) The PyMOL Molecular Graphics System (DeLano Scientific, Palo Alto, CA, USA.).

20. Firnberg E, Labonte JW, Gray JJ, & Ostermeier M (2014) A Comprehensive, High-Resolution Map of a Gene's Fitness Landscape. *Molecular Biology and Evolution* 31(6):1581-1592.
21. Deng Z, *et al.* (2012) Deep Sequencing of Systematic Combinatorial Libraries Reveals  $\beta$ -Lactamase Sequence Constraints at High Resolution. *Journal of Molecular Biology* 424(3-4):150-167.
22. Kather I, Jakob RP, Dobbek H, & Schmid FX (2008) Increased Folding Stability of TEM-1  $\beta$ -Lactamase by In Vitro Selection. *Journal of Molecular Biology* 383(1):238-251.
23. Raquet X, *et al.* (1995) Stability of TEM  $\beta$ -lactamase mutants hydrolyzing third generation cephalosporins. *Proteins: Structure, Function, and Bioinformatics* 23(1):63-72.
24. Bershtein S, Goldin K, & Tawfik DS (2008) Intense Neutral Drifts Yield Robust and Evolvable Consensus Proteins. *Journal of Molecular Biology* 379(5):1029-1044.
25. Brown NG, Pennington JM, Huang W, Ayvaz T, & Palzkill T (2010) Multiple Global Suppressors of Protein Stability Defects Facilitate the Evolution of Extended-Spectrum TEM  $\beta$ -Lactamases. *Journal of Molecular Biology* 404(5):832-846.
26. Dubus A, Wilkin JM, Raquet X, Normark S, & Frère JM (1994) Catalytic mechanism of active-site serine  $\beta$ -lactamases: role of the conserved hydroxy group of the Lys-Thr(Ser)-Gly triad. *Biochemical Journal* 301(2):485-494.
